# Supplementary material
Source: HighWire-hosted journal article supplement (http://www.cmaj.ca/highwire/filestream/69798/field_highwire_adjunct_files/0/170892-res-1-at.pdf)
Supplement: 170892-res-1-at.pdf [file 170892-res-1-at.pdf]

**Appendix 1 (as supplied by the authors):  
Patient group definitions**

| <b>Service Recipient Code</b> | <b>Patient Group</b> |
|-------------------------------|----------------------|
| 91 - Acute                    | Short Stay           |
| 92 - Wound                    | Short Stay           |
| 93 - Maintenance              | Long Stay            |
| 94 - Long Term Supportive     | Long Stay            |
| 95 - End of Life              | Excluded             |
